# Supplementary material
Source: MDPI journal article supplement (https://www.mdpi.com/2254-9625/12/2/15)

# (In)Segurança e Criminalidade

Universidade Fernando Pessoa  
(Ana Sani & Laura Nunes)

\* Required

O inquérito a que vai responder visa recolher informação para a realização de um estudo sobre a perceção de segurança/insegurança e a criminalidade na área onde estuda atualmente.

A sua participação será anónima e confidencial, destinando-se, única e exclusivamente, à realização do estudo cujos resultados ajudarão a melhorar as condições de segurança da área onde estuda atualmente (Polo Universitário de Asprela).

O inquérito divide-se em 5 partes: a parte A prende-se com dados sociodemográficos; a parte B procura apurar a forma como sente a segurança na sua área de residência; a parte C questiona sobre experiências de vitimação; a parte D tenta avaliar como operar o controlo social no lidar com o fenómeno criminal e, por fim, a parte E pretende apreciar o envolvimento dos cidadãos na resolução dos problemas da comunidade em que estuda atualmente. O preenchimento do questionário demora, aproximadamente, 30 minutos.

Agradece-se a sua participação consciente e empenhada.

## Declaração de Consentimento Informado

Declaro que aceito participar no estudo intitulado Diagnóstico Local de Segurança do Polo Universitário de Asprela, de que são responsáveis Ana Isabel Sani e Laura M. Nunes, investigadoras e docentes na Universidade Fernando Pessoa.

Declaro que, antes de optar pela minha participação, tomei conhecimento dos objetivos do estudo, de todos os aspetos que considere importantes para a minha decisão e do que tenho de fazer para participar. Fui também informado(a) da duração esperada e dos procedimentos do estudo, tendo-me sido dadas garantias de anonimato e de confidencialidade, além de que me foi transmitido o direito que me assiste de recusar participar ou de cessar a minha participação, em qualquer momento, sem quaisquer consequências para mim.

Tendo compreendido todas as informações que me foram dadas a respeito, aceito participar voluntariamente, colaborando com total sinceridade.

1. \*

*Check all that apply.*

☐ Concordo e participo voluntariamente

## Parte A: Dados Sociodemográficos

2. 1.1. Sexo \*

*Mark only one oval.*

☐ Masculino

☐ Feminino

3. 1.2. Idade \*

**4. 1.3. Nacionalidade \****Mark only one oval.*

- ☐ Portuguesa
- ☐ Estrangeira

**5. 1.3.b Qual?***(se estrangeira)*

---

**6. 1.4. Estado Civil \****Mark only one oval.*

- ☐ Solteiro(a)
- ☐ Casado(a) / União de Facto
- ☐ Divorciado(a) / Separado(a)
- ☐ Viúvo(a)
- ☐ Outro

**7. 1.4.b Qual?***(se outro)*

---

**8. 1.5. Escolaridade \****Mark only one oval.*

- ☐ Primeiro Ciclo (Licenciatura) – 1º Ano
- ☐ Primeiro Ciclo (Licenciatura) – 2º Ano
- ☐ Primeiro Ciclo (Licenciatura) – 3º Ano
- ☐ Segundo Ciclo (Mestrado) – 1º Ano
- ☐ Segundo Ciclo (Mestrado) – 2º Ano
- ☐ Terceiro Ciclo (Doutoramento)
- ☐ Outro

**9. 1.5.b Qual?***(se outro)*

---

**10. 1.5.c Estabelecimento de Ensino Superior que frequenta \***

---

**11. 1.6.a Rua de residência no Porto**

---

12. **1.6. Tipo Habitação \****Mark only one oval.*

- ☐ Apartamento
- ☐ Casa
- ☐ Outro

13. **1.7. Situação Ocupacional \****Mark only one oval.*

- ☐ Estudante
- ☐ Trabalhador-Estudante

14. **1.7.b Área laboral***(se trabalhador-estudante)*

---

15. **1.8. Com quem vive? \****Mark only one oval.*

- ☐ Família nuclear (e.g., Cônjuge/companheiro e filhos; Pais; Pais e irmão(s))
- ☐ Família nuclear alargada (e.g., Avó(s) e irmão(s); Pais e irmão(s) e sobrinho(s); Pais e avó(s); Cônjuge e filho(s) e Mãe; Cônjuge e filho(s), netos e genro; Pais e irmão(s) e filho(s); Filho(s) e irmão(s))
- ☐ Família alargada (e.g., tios e primos; avós; irmã cunhados e sobrinhos)
- ☐ Pares (e.g., universitários; institucionalizados)
- ☐ Não se aplica (Se vive só)

## Parte B: Perceção de Segurança/Insegurança

16. **2.1. Refira se considera que estuda numa área segura \****Mark only one oval.*

- ☐ Sim
- ☐ Não

17. **2.1.a Explique porquê \***

---

---

---

---

---

18. **2.2. Diga se lhe parece que a criminalidade tem aumentado, na área onde que estuda \****Mark only one oval.*

- ☐ Sim
- ☐ Não

**19. 2.2.a Explique porquê \***

---

---

---

---

---

**2.3. Da lista seguinte, atendendo ao seu ponto de vista, assinale os crimes que mais frequentemente ocorrem na área onde estuda atualmente**

---

(Escolha uma ou mais opções)

**20. 2.3.a.**

*Check all that apply.*

☐ Burla

**21. 2.3.b.**

*Check all that apply.*

☐ Furto (ex: automóvel)

**22. 2.3.c**

*Check all that apply.*

☐ Roubo (ex: esticção)

**23. 2.3.d.**

*Check all that apply.*

☐ Assalto a residência

**24. 2.3.e.**

*Check all that apply.*

☐ Assalto a estabelecimento comercial

**25. 2.3.f.**

*Check all that apply.*

☐ Ofensa sexual

**26. 2.3.g.**

*Check all that apply.*

☐ Agressão física

**27. 2.3.h.**

*Check all that apply.*

☐ Violência doméstica: contra/entre menores

28. **2.3.i.***Check all that apply.*☐ Violência doméstica: contra/entre namorados/cônjuges,29. **2.3.j.***Check all that apply.*☐ Violência doméstica: contra/entre idosos30. **2.3.k.***Check all that apply.*☐ Danos a espaços/equipamentos públicos31. **2.3.l.***Check all that apply.*☐ Crimes rodoviários32. **2.3.m.***Check all that apply.*☐ Tráfico de drogas33. **2.3.n.***Check all that apply.*☐ Tráfico de armas34. **2.3.o.***Check all that apply.*☐ Desconhece/Nenhum35. **2.3.p.***Check all that apply.*☐ Outros36. **2.3.pl Quais?**

(se indicou outros)

---

---

---

---

---

**2.4. Da lista seguinte, atendendo ao seu ponto de vista, assinale os crimes que mais teme na área onde estuda atualmente**

---

(escolha uma ou mais opções)

37. **2.4.a.**

*Check all that apply.*

☐ Burla

38. **2.4.b.**

*Check all that apply.*

☐ Furto (ex: automóvel)

39. **2.4.c.**

*Check all that apply.*

☐ Roubo (ex: esticção)

40. **2.4.d.**

*Check all that apply.*

☐ Assalto a residência

41. **2.4.e.**

*Check all that apply.*

☐ Assalto a estabelecimento comercial

42. **2.4.f.**

*Check all that apply.*

☐ Ofensa sexual

43. **2.4.g.**

*Check all that apply.*

☐ Agressão física

44. **2.4.h.**

*Check all that apply.*

☐ Violência doméstica: contra/entre menores

45. **2.4.i.**

*Check all that apply.*

☐ Violência doméstica: contra/entre cônjuges/namorados

46. **2.4.j.**

*Check all that apply.*

☐ Violência doméstica: contra/entre idosos

47. **2.4.k.**

*Check all that apply.*

☐ Danos a espaços/equipamentos públicos

48. **2.4.l.***Check all that apply.*☐ Crimes rodoviários49. **2.4.m.***Check all that apply.*☐ Tráfico de drogas50. **2.4.n.***Check all that apply.*☐ Tráfico de armas51. **2.4.o.***Check all that apply.*☐ Desconhece/Nenhum52. **2.4.p.***Check all that apply.*☐ Outros53. **2.4.pl Quais?**

(se indicou outros)

---

---

---

---

---

---

## 2.5. Da lista seguinte, atendendo ao seu ponto de vista, assinale as condições que, na área onde estuda atualmente, mais lhe parecem favorecer a ocorrência de crime

---

(escolha uma ou mais opções)

54. **2.5.a.***Check all that apply.*☐ Consumo de drogas/álcool55. **2.5.b.***Check all that apply.*☐ Pobreza/Desemprego

56. **2.5.c.***Check all that apply.*☐ Problemas familiares57. **2.5.d.***Check all that apply.*☐ Conflitos e delinquência juvenil58. **2.5.e.***Check all that apply.*☐ Má iluminação pública59. **2.5.f.***Check all that apply.*☐ Maus acessos/arruamentos60. **2.5.g.***Check all that apply.*☐ Ausência de espaços verdes/de lazer61. **2.5.h.***Check all that apply.*☐ Presença de pessoas estranhas62. **2.5.i.***Check all that apply.*☐ Reduzido movimento durante a noite63. **2.5.j.***Check all that apply.*☐ Policiamento deficitário64. **2.5.k.***Check all that apply.*☐ Incapacidade de atuação dos agentes de autoridade65. **2.5.l.***Check all that apply.*☐ Pouca severidade para com os ofensores66. **2.5.m.***Check all that apply.*☐ Desconhece/Nenhum



67. **2.5.n***Check all that apply.*☐ Outros68. **2.5.nl** Quais?

(se indicou outros)

---

---

---

---

---

## 2.6. Da lista seguinte, atendendo ao seu ponto de vista, assinale as incivildades que mais frequentemente se verificam na área onde estuda atualmente

---

(escolha uma ou mais opções)

69. **2.6.a.***Check all that apply.*☐ Urinar na via pública70. **2.6.b.***Check all that apply.*☐ Produzir ruído na via pública71. **2.6.c.***Check all that apply.*☐ Deixar as fezes de animais de companhia na via pública72. **2.6.d.***Check all that apply.*☐ Dispersar lixo pela rua73. **2.6.e.***Check all that apply.*☐ Violar regras de trânsito74. **2.6.f.***Check all that apply.*☐ Estacionar de forma caótica

75. **2.6.g.***Check all that apply.*☐ Peditórios ilegais (ex. arrumadores de automóveis)76. **2.6.h.***Check all that apply.*☐ Desconhece/Nenhum77. **2.6.i.***Check all that apply.*☐ Outros78. **2.6.il Quais?**

(se indicou outros)

---

---

---

---

---

## Parte C: Vitimação

79. **3.1. Diga se, nos últimos 5 anos, foi vítima de crime na área onde estuda atualmente \***

(se foi vítima de mais de 1 crime, refira-se ao mais grave)

*Mark only one oval.*☐ Sim *Skip to question 80.*☐ Não *Skip to question 95.*

Reportando-se aos últimos 5 anos, referiu ter sido vítima de crime na área onde estuda atualmente.

80. **3.1.1. Qual? \***

---

---

---

---

---

81. **3.1.2. Descreva os danos sofridos \***

(físicos/psicológicos/materiais)

---

---

---

---

---

Relativamente ao crime que acaba de descrever, responda às questões seguintes:

**82. 3.1.3. Em que altura ocorreu: \***

*Mark only one oval.*

- ☐ De dia
- ☐ De noite
- ☐ Não Sabe

**83. 3.1.4. Onde se deu a ocorrência: \***

*Mark only one oval.*

- ☐ Em Casa
- ☐ Na Rua
- ☐ Outro

**84. 3.1.4.b Qual?**

(se indicou outro)

\_\_\_\_\_

**85. 3.1.5. Nessa altura encontrava-se: \***

*Mark only one oval.*

- ☐ Sozinho
- ☐ Acompanhado
- ☐ Não Sabe

**86. 3.1.6. O ofensor era alguém: \***

*Mark only one oval.*

- ☐ Conhecido
- ☐ Estranho
- ☐ Não Sabe

**87. 3.1.7. Diga se contactou as autoridades \***

*Mark only one oval.*

- ☐ Não
- ☐ Sim

88. **3.1.7.a Explique porquê \***

(de acordo com a sua resposta prévia, quer tenha indicado sim ou não)

*Mark only one oval.*

- ☐ Não confia
- ☐ Não vale a pena
- ☐ Falta de tempo
- ☐ Medo
- ☐ Confia
- ☐ Vale a pena
- ☐ Seguradora
- ☐ Outro

89. **3.1.7.b Qual?**

(se indicou outro)

---

---

---

---

---

90. **3.1.8. Diga se formalizou oficialmente a queixa \****Mark only one oval.*

- ☐ Não
- ☐ Sim

91. **3.1.8.a Explique porquê \***

---

---

---

---

---

92. **3.1.9. Refira as medidas tomadas pelas autoridades \***

---

---

---

---

---

93. **3.1.10. Diga se ficou satisfeito com essas medidas \****Mark only one oval.*

- ☐ Não
- ☐ Sim

94. **3.1.10.a Explique porquê \***

---

---

---

---

---

95. **3.2. Refira se, nos últimos 5 anos, alguém seu conhecido ou colega foi vítima de crime na área onde estuda atualmente \***

(se foi vítima de mais de 1 crime, refira-se ao mais grave).

*Mark only one oval.*

- ☐ Sim      *Skip to question 96.*
- ☐ Não      *Skip to question 112.*

Reportando-se aos últimos 5 anos, referiu que alguém seu conhecido ou colega foi vítima de crime na área onde estuda atualmente

96. **3.2.a Quem? \***

---

97. **3.2.1. Que crime \***

---

---

---

---

---

98. **3.2.2. Descreva os danos sofridos: \***

(físicos/psicológicos/materiais)

---

---

---

---

---

---

Relativamente ao crime que acaba de descrever, responda às questões seguintes:

99. **3.2.3. Em que altura ocorreu: \***

*Mark only one oval.*

- ☐ De dia
- ☐ De noite
- ☐ Não sabe

100. **3.2.4. Onde se deu a ocorrência: \****Mark only one oval.*

- ☐ Em Casa
- ☐ Na Rua
- ☐ Não Sabe
- ☐ Outro local

101. **3.2.4.b Qual?***(se indicou outro local)*

---

102. **3.2.5. Nessa altura esse conhecido ou colega encontrava-se: \****Mark only one oval.*

- ☐ Sozinho
- ☐ Acompanhado
- ☐ Não sabe

103. **3.2.6. O ofensor era alguém: \****Mark only one oval.*

- ☐ Conhecido
- ☐ Estranho
- ☐ Não sabe

104. **3.2.7. Diga se o seu conhecido ou colega contactou as autoridades \****Mark only one oval.*

- ☐ Não
- ☐ Sim
- ☐ Não sabe

105. **3.2.7.a Explique porquê \****(de acordo com a sua resposta, se indicou sim ou não)**Mark only one oval.*

- ☐ Não confia
- ☐ Não vale a pena
- ☐ Falta de tempo
- ☐ Medo
- ☐ Confia
- ☐ Vale a pena
- ☐ Seguradora
- ☐ Não sabe
- ☐ Outro

106. **3.2.7.b Qual?**

(se indicou outro)

---

---

---

---

---

107. **3.2.8. Diga se o seu conhecido ou colega formalizou oficialmente a queixa \****Mark only one oval.*☐

Não

*After the last question in this section, skip to question 112.*☐

Sim

☐

Não Sabe

*After the last question in this section, skip to question 112.*108. **3.2.8.a Explique porquê**

---

---

---

---

---

Referiu que o seu conhecido ou colega formalizou oficialmente a queixa.

109. **3.2.9. Refira as medidas tomadas pelas autoridades**

---

---

---

---

---

110. **3.2.10. Diga se o seu conhecido ou colega ficou satisfeito com essas medidas \****Mark only one oval.*☐

Não

☐

Sim

☐

Não sabe

111. **3.2.10.a Explique porquê**

---

---

---

---

---

**Parte D: Controlo Social**

112. **4.1. Refira se considera que os agentes de segurança fazem tudo para garantir a segurança na área onde estuda atualmente \***

(escolha apenas uma opção de resposta)

*Mark only one oval.*

- ☐ Sempre
- ☐ Quase Sempre
- ☐ Quase Nunca
- ☐ Nunca
- ☐ Não Sabe

113. **4.1.1. Explique a sua opção de resposta \***

---

---

---

---

---

114. **4.2. Indique o grau de satisfação em relação à atuação dos agentes de segurança, na área onde estuda atualmente \***

(escolha apenas uma opção de resposta)

*Mark only one oval.*

- ☐ Muito Satisfeito(a)
- ☐ Satisfeito(a)
- ☐ Pouco Satisfeito(a)
- ☐ Nada Satisfeito(a)
- ☐ Não Sabe

115. **4.2.1. Explique a sua opção de resposta \***

---

---

---

---

---

116. **4.3. Refira com que frequência recorre à ajuda de colegas, amigos ou vizinhos, em caso de ter algum problema, na área onde estuda atualmente \***

(escolha apenas uma opção de resposta)

*Mark only one oval.*

- ☐ Sempre
- ☐ Quase Sempre
- ☐ Quase Nunca
- ☐ Nunca



117. 4.3.1. Explique a sua opção de resposta \*

---

---

---

---

---

118. 4.4. Refira com que frequência recorre à ajuda das entidades de apoio na área onde estuda atualmente, em caso de ter algum problema \*

(escolha apenas uma opção de resposta)

Mark only one oval.

- ☐ Sempre
- ☐ Quase Sempre
- ☐ Quase Nunca
- ☐ Nunca

119. 4.4.1. Explique a sua opção de resposta \*

---

---

---

---

---

120. 4.4.2. Se recorre ao apoio de entidades, mencione quais:

---

---

---

---

---

## Parte E: Participação Comunitária

121. 5.1. Diga há quantos anos estuda nesta área (Polo Universitário de Asprela) \*

Mark only one oval.

- ☐ 3 Anos ou menos
- ☐ 4 a 6 Anos
- ☐ 7 a 9 Anos
- ☐ 10 Anos ou mais

**5.2. Refira o que gostaria de ver melhorado na área onde estuda atualmente, no sentido de que tivesse mais qualidade de vida**

---

(Faça uma lista por ordem de importância, colocando no espaço 1 a medida que lhe parece mais importante e prosseguindo até ao espaço 5, onde colocará a medida que lhe parece menos importante)

122. **5.2.1**

(em primeiro lugar)

---

123. **5.2.2**

(em segundo lugar)

---

124. **5.2.3**

(em terceiro lugar)

---

125. **5.2.4**

(em quarto lugar)

---

126. **5.2.5**

(em quinto lugar)

---

### **5.3. Refira o que gostaria de ver melhorado na área onde estuda atualmente, no sentido de que houvesse mais segurança**

---

(Faça uma lista por ordem de importância, colocando no espaço 1 a medida que lhe parece mais importante e prosseguindo até ao espaço 5, onde colocará a medida que lhe parece menos importante)

127. **5.3.1**

(em primeiro lugar)

---

128. **5.3.2**

(em segundo lugar)

---

129. **5.3.3**

(em terceiro lugar)

---

130. **5.3.4.**

(em quarto lugar)

---

131. **5.3.5.**

(em quinto lugar)

---

132. **5.4. Diga se estaria disposto a colaborar no sentido de que houvesse mais segurança na área onde estuda atualmente \***

(escolha apenas uma opção de resposta)

*Mark only one oval.*

- ☐ Sempre
- ☐ Quase Sempre
- ☐ Quase Nunca
- ☐ Nunca

133. **5.4.a. Se respondeu sempre ou quase sempre, especifique de que forma**

---

---

---

---

---

134. **5.4.b. Se respondeu quase nunca ou nunca, explique porquê**

---

---

---

---

---

135. **5.5. Diga qual a força da sua ligação ao local onde estuda atualmente \***

(escolha apenas uma opção de resposta)

*Mark only one oval.*

- ☐ Muito forte
- ☐ Forte
- ☐ Pouco Forte
- ☐ Nada Forte

136. **5.5.1. Explique a sua opção de resposta \***

---

---

---

---

---

**Muito Obrigado pela sua Colaboração!**

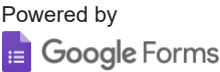

Supplement: s1 [file s1]
